# Supplementary material for: Arcanobacterium haemolyticum Phospholipase D Enzymatic Activity Promotes the Hemolytic Activity of the Cholesterol-Dependent Cytolysin Arcanolysin
Source: Toxins (Basel). 2018 May 23;10(6):213. doi: 10.3390/toxins10060213 (PMC6024514; doi:10.3390/toxins10060213)
Supplement: Supplementary file 1 [file toxins-10-00213-s001.pdf]

**Figure S1.** Sequence alignment of various PLD amino acid sequences. PLD amino acid sequences from *Arcanobacterium haemolyticum* (WT\_041640381.1), *Corynebacterium pseudotuberculosis* (WP\_013240889.1), *Corynebacterium ulcerans* (WP\_014525098.1) and *Dermatophilus congolensis* (WP\_028327396.1) were aligned using Clustal Omega analysis. Amino acids highlighted in yellow were selected as candidates for mutagenesis to alanine.
